# Supplementary material for: Microcalcification and 99mTc-Pyrophosphate Uptake without Increased Bone Metabolism in Cardiac Tissue from Patients with Transthyretin Cardiac Amyloidosis
Source: MDPI journal article supplement (doi:10.3390/ijms24031921), 2023-01-18
Supplement: s1 [file s1]

**Supplementary Table S1.** Summary of the results.

| No | Sex | Age | Diagnosis | Perugini<br>Grade<br>Score | Microcalcification<br>detected by von<br>Kossa staining | Calcified particles<br>detected by transmission<br>electron microscope | RNA<br>extraction | Hemodialysis | Serum<br>creatinine<br>(mg/dL) | Estimated glomerular<br>filtration rate<br>(mL/min/1.73 m <sup>2</sup> ) | Serum calcium<br>(mg/dL) |
|----|-----|-----|-----------|----------------------------|---------------------------------------------------------|------------------------------------------------------------------------|-------------------|--------------|--------------------------------|--------------------------------------------------------------------------|--------------------------|
| 1  | M   | 62  | AL-CA     | 0                          | -                                                       |                                                                        | +                 |              | 1.24                           | 46.9                                                                     | 10.5                     |
| 2  | F   | 57  | AL-CA     | 0                          | -                                                       |                                                                        | +                 |              | 0.57                           | 83.1                                                                     | 9.0                      |
| 3  | M   | 72  | ATTRwt-CA | 3                          |                                                         |                                                                        |                   |              | 1.24                           | 44.9                                                                     | 9.7                      |
| 4  | M   | 76  | ATTRwt-CA | 3                          |                                                         |                                                                        |                   |              | 0.87                           | 61.6                                                                     | 9.2                      |
| 5  | M   | 28  | non-CA    | 0                          |                                                         |                                                                        | +                 | +            | N/A                            | N/A                                                                      | N/A                      |
| 6  | M   | 68  | ATTRwt-CA | 3                          |                                                         |                                                                        |                   |              | 0.94                           | 61.8                                                                     | 9.2                      |
| 7  | F   | 75  | ATTRwt-CA | 3                          |                                                         |                                                                        |                   |              | 0.81                           | 52.3                                                                     | 9.4                      |
| 8  | F   | 81  | ATTRwt-CA | 3                          |                                                         |                                                                        |                   |              | 0.83                           | 50                                                                       | N/A                      |
| 9  | M   | 77  | ATTRwt-CA | 3                          |                                                         |                                                                        |                   |              | 1.73                           | 30.6                                                                     | N/A                      |
| 10 | M   | 77  | ATTRwt-CA | 3                          |                                                         |                                                                        |                   |              | 2.04                           | 25.6                                                                     | 8.7                      |
| 11 | M   | 84  | ATTRwt-CA | 3                          |                                                         |                                                                        |                   |              | 0.91                           | 60.3                                                                     | 8.6                      |
| 12 | F   | 49  | non-CA    | 0                          |                                                         |                                                                        | +                 | +            | N/A                            | N/A                                                                      | N/A                      |
| 13 | M   | 88  | ATTRwt-CA | 3                          |                                                         |                                                                        |                   |              | 0.98                           | 54.9                                                                     | 8.3                      |
| 14 | M   | 82  | ATTRwt-CA | 3                          |                                                         |                                                                        |                   |              | 1.33                           | 40.1                                                                     | N/A                      |
| 15 | M   | 81  | non-CA    | 0                          |                                                         |                                                                        |                   |              | 1.51                           | 34.9                                                                     | 9.4                      |
| 16 | M   | 67  | non-CA    | 0                          |                                                         |                                                                        |                   |              | 1.01                           | 57.4                                                                     | 9.1                      |
| 17 | M   | 77  | ATTRwt-CA | 3                          |                                                         |                                                                        |                   |              | 1.01                           | 55.2                                                                     | N/A                      |
| 18 | M   | 71  | ATTRwt-CA | 3                          | +                                                       |                                                                        |                   |              | 0.82                           | 70.9                                                                     | 9.3                      |
| 19 | M   | 68  | ATTRwt-CA | 3                          | +                                                       | -                                                                      | +                 |              | 0.88                           | 77.3                                                                     | 9.5                      |
| 20 | M   | 67  | non-CA    | 0                          |                                                         |                                                                        |                   |              | 0.8                            | 74.1                                                                     | 8.7                      |
| 21 | F   | 81  | ATTRwt-CA | 3                          | -                                                       |                                                                        | +                 |              | 0.9                            | 45.6                                                                     | 9.7                      |
| 22 | M   | 61  | AL-CA     | 1                          | -                                                       | -                                                                      | +                 |              | 1.82                           | 31                                                                       | 9.3                      |
| 23 | M   | 75  | ATTRwt-CA | 2                          | +                                                       |                                                                        | +                 |              | 3.45                           | 14.5                                                                     | 8.7                      |
| 24 | M   | 76  | ATTRwt-CA | 3                          | -                                                       |                                                                        | +                 |              | 1.11                           | 49.9                                                                     | 9.2                      |

|    |   |    |           |   |   |   |   |      |      |      |
|----|---|----|-----------|---|---|---|---|------|------|------|
| 25 | M | 55 | non-CA    | 0 | - |   | + | 0.96 | 64.2 | 9.1  |
| 26 | M | 77 | ATTRwt-CA | 3 | + |   | + | 2.4  | 21.4 | 9.3  |
| 27 | M | 40 | non-CA    | 0 | - | - | + | 4.89 | 11.9 | 8.5  |
| 28 | M | 84 | ATTRwt-CA | 3 | - |   | + | 0.77 | 72.4 | 9.1  |
| 29 | M | 79 | ATTRv-CA  | 3 | + |   | + | 1.56 | 34   | 8.9  |
| 30 | M | 80 | non-CA    | 0 | - |   |   | 1.11 | 49.2 | 8.8  |
| 31 | M | 77 | ATTRwt-CA | 3 | + |   | + | 0.73 | 78.7 | 9.4  |
| 32 | M | 37 | non-CA    | 0 | - | - | + | 1.11 | 61.4 | 10.2 |
| 33 | F | 83 | ATTRwt-CA | 3 | - |   |   | N/A  | N/A  | N/A  |
| 34 | F | 77 | ATTRwt-CA | 3 | + | + | + | 1.24 | 32.6 | 9.1  |
| 35 | F | 74 | non-CA    | 0 | - |   | + | 0.72 | 59.7 | 9.0  |
| 36 | M | 66 | ATTRwt-CA | 3 | + |   | + | 0.92 | 63.9 | 9.2  |
| 37 | M | 67 | non-CA    | 2 | - |   |   | 1.11 | 51.8 | 9.7  |
| 38 | M | 73 | ATTRwt-CA | 3 |   |   |   | 1.02 | 55.4 | 9.0  |
| 39 | F | 63 | AL-CA     | 2 | - |   | + | 0.86 | 51.5 | 9.3  |
| 40 | M | 80 | AL-CA     | 1 | + | - | + | N/A  | N/A  | N/A  |
| 41 | M | 84 | ATTRwt-CA | 3 | - |   | + | 1.44 | 36.5 | 9.0  |
| 42 | M | 88 | ATTRwt-CA | 3 |   |   |   | 1.39 | 37.4 | 8.7  |
| 43 | M | 76 | AL-CA     | 0 | + |   | + | 1.99 | 26.4 | 8.8  |

AL-CA, amyloid light-chain cardiac amyloidosis; ATTRwt-CA, wild-type transthyretin cardiac amyloidosis; ATTRv-CA, hereditary transthyretin cardiac amyloidosis; noncardiac amyloidosis, non-CA.
